# Supplementary material for: Dandelion-like Co3O4 mesoporous nanostructures supported by a Cu foam for efficient oxygen evolution and lithium storage
Source: Royal Society of Chemistry journal article supplement (doi:10.1039/c8cc02408a), 2018-01-01
Supplement: c8cc02408a1.pdf [file c8cc02408a1.pdf]

# **Dandelion-like Co<sub>3</sub>O<sub>4</sub> mesoporous nanostructures supported by Cu foam for efficient oxygen evolution and lithium storage**

Fang Wang,<sup>‡c</sup> Zhi-Bo Liu,<sup>‡d</sup> Ke-Xin Wang,<sup>‡c</sup> Xiao-Dong Zhu,<sup>\*a,b</sup> Xiu-Hua Fan,<sup>c</sup> Jian Gao,<sup>c</sup> Yu-Jie Feng,<sup>b</sup>

Ke-Ning Sun<sup>b</sup> and Yi-Tao Liu<sup>\*d</sup>

<sup>a</sup>State Key Laboratory of Urban Water Resource and Environment, Harbin Institute of Technology, Harbin 150090, China

<sup>b</sup>Academy of Fundamental and Interdisciplinary Sciences, Harbin Institute of Technology, Harbin 150080, China

<sup>c</sup>Department of Chemistry, Harbin Institute of Technology, Harbin 150001, China.

<sup>d</sup>State Key Laboratory of Organic–Inorganic Composites, Beijing Key Laboratory of Electrochemical Process and Technology for Materials, Beijing University of Chemical Technology, Beijing 100029, China.

## ***Experimental Section***

***Preparation of Co<sub>3</sub>O<sub>4</sub>@Cu foam:*** The Co<sub>3</sub>O<sub>4</sub>@Cu foam was prepared by a combination of hydrothermal synthesis and annealing. Briefly, Co(NO<sub>3</sub>)<sub>2</sub>·6H<sub>2</sub>O (1 mmol), NH<sub>4</sub>F (2.7 mmol) and CO(NH<sub>2</sub>)<sub>2</sub> (7.5 mmol) were dissolved in deionized water (30 ml) and stirred for 30 min. Then, the fully mixed solution and Cu foam ( $\varphi = 12$  mm) were transferred to a Teflon-lined stainless steel autoclave (50 ml), and heated at 110 °C for 12 h. After the autoclave was cooled naturally to ambient temperature, the precipitate was washed by absolute alcohol and deionized water, and vacuum-dried at 60 °C overnight. Finally, the precipitate was annealed at different temperatures (200, 300, 400 and 500 °C) for different times (1, 2, 3 and 4 h). For comparison, the Co<sub>3</sub>O<sub>4</sub> powder was prepared by annealing at 300 °C for 2 h in the absence of Cu foam.

***Electrochemical testing:*** The OER properties were measured in 1M KOH aqueous solution by using a three-electrode mode on an electrochemical workstation (CHI 660D, CH Instruments). The Pt net and SCE were used as counter and reference electrodes, respectively. All potentials were converted to the reversible hydrogen electrode (RHE) based on the equation  $E(\text{vs. RHE}) = E(\text{vs. SCE}) + 0.244 + 0.059 \times \text{pH}$ . The OER activities were investigated by linear sweep voltammetry (LSV) at a scan rate of 5 mV s<sup>-1</sup> and the LSV data were made with an 80% ohmic drop (iR) correction tested by impedance spectroscopy. Electrochemical impedance spectroscopy (EIS) was performed by applying an AC voltage of 5 mV from 100 kHz to 0.01 Hz.

CR-2025 coin-type cells were assembled to evaluate the lithium storage performance of the Co<sub>3</sub>O<sub>4</sub>@Cu foam inside an argon-filled glove box. The microporous polypropylene membrane, lithium foil, and 1 M solution of LiPF<sub>6</sub> in ethylene carbonate and dimethyl carbonate (volume ratio = 1:1) were used as the separator, counter and reference electrode, and electrolyte, respectively. The assembled cells were allowed to soak overnight, and the electrochemical tests were performed on a LAND battery testing unit. Cyclic voltammetry (CV) was performed using a CHI 660E electrochemical workstation between 0.01–3.00 V (vs. Li<sup>+</sup>/Li) at a scan rate of 0.1 mV s<sup>-1</sup>. Electrochemical impedance spectroscopy (EIS) was performed by applying an AC voltage of 5 mV from 100 kHz to 0.01 Hz.

*Supplementary Figures and Tables*

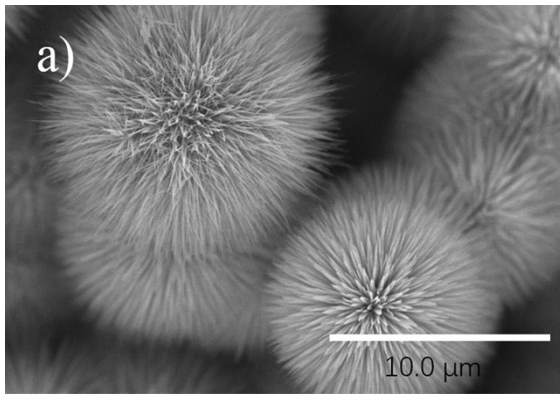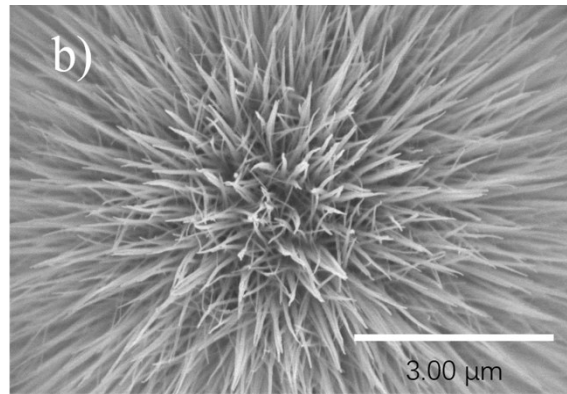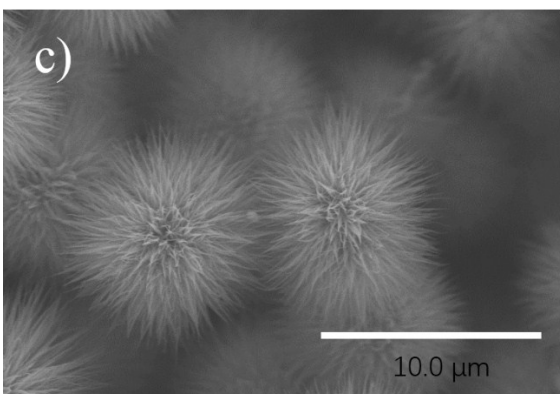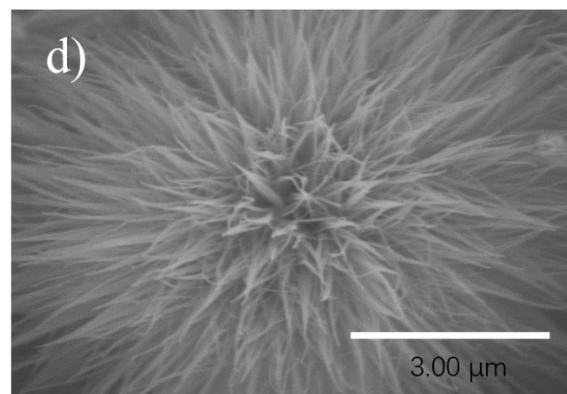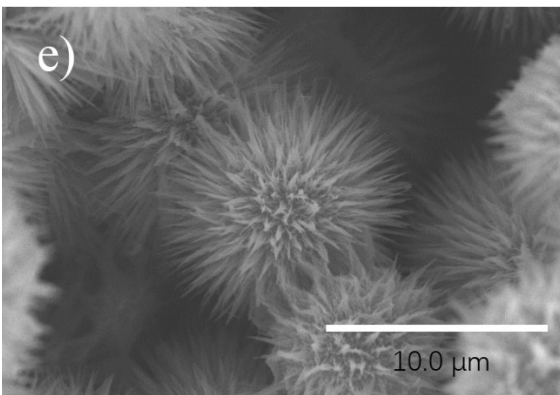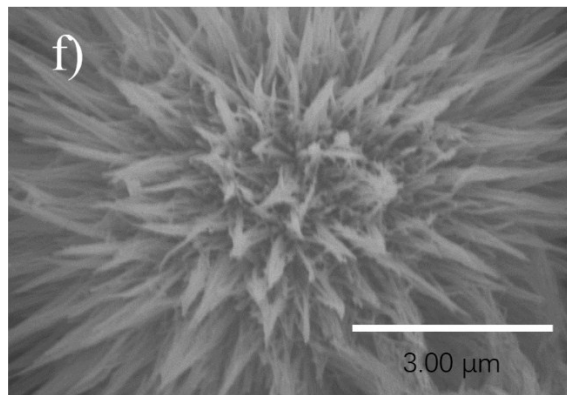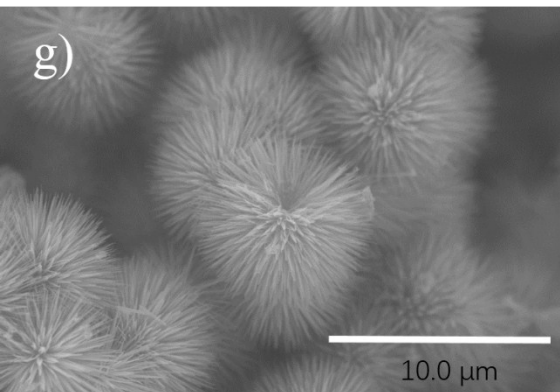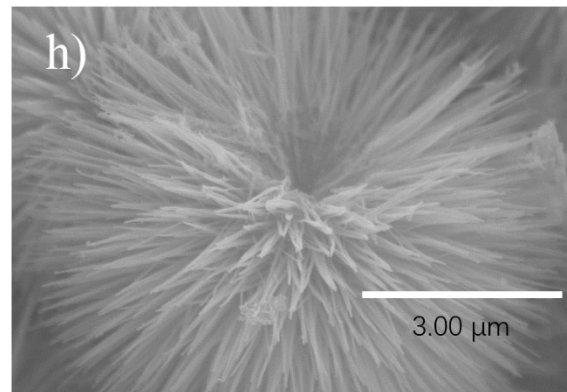

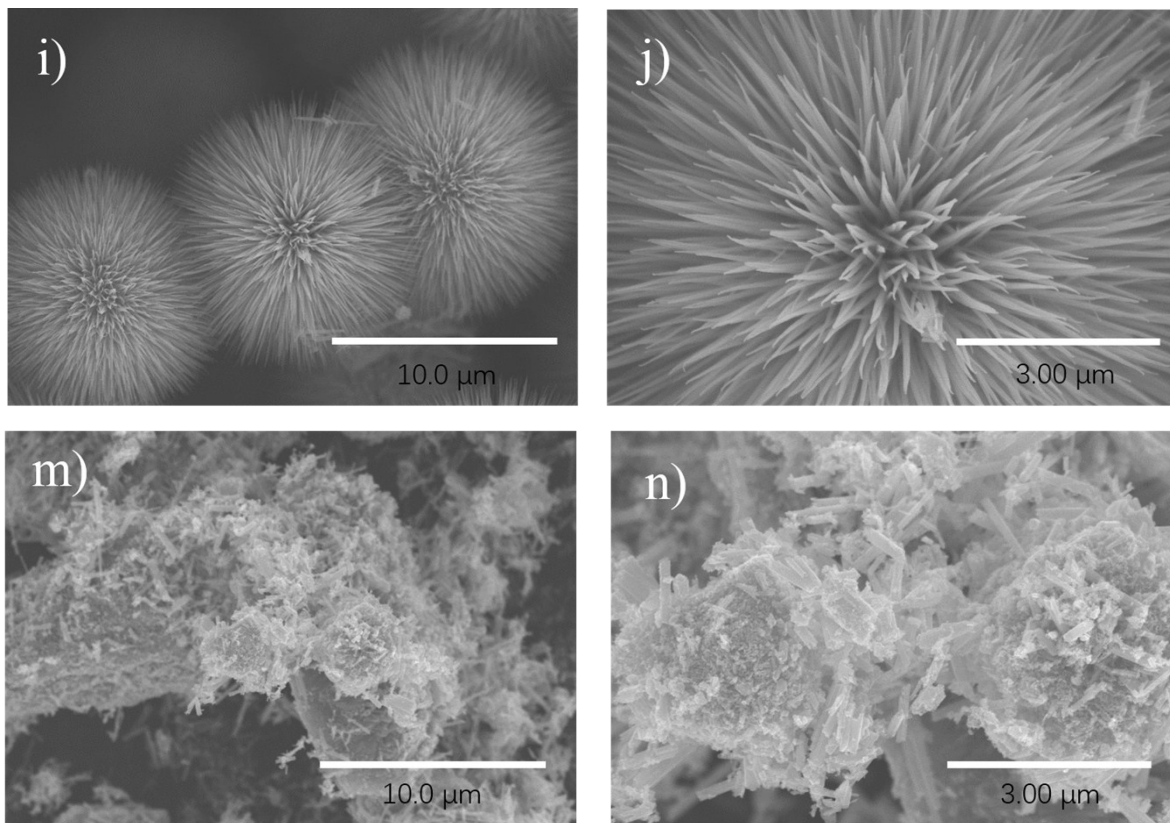

**Fig. S1** – Low- and high-magnification SEM images of (a, b)  $\text{Co}_3\text{O}_4@\text{Cu}$  foam-300°C-2h, (c, d)  $\text{Co}_3\text{O}_4@\text{Cu}$  foam-400°C-2h, (e, f)  $\text{Co}_3\text{O}_4@\text{Cu}$  foam-500°C-2h, (g, h)  $\text{Co}_3\text{O}_4@\text{Cu}$  foam-300°C-1h, (i, j)  $\text{Co}_3\text{O}_4@\text{Cu}$  foam-300°C-4h, and (m, n)  $\text{Co}_3\text{O}_4$  powder-300°C-2h.

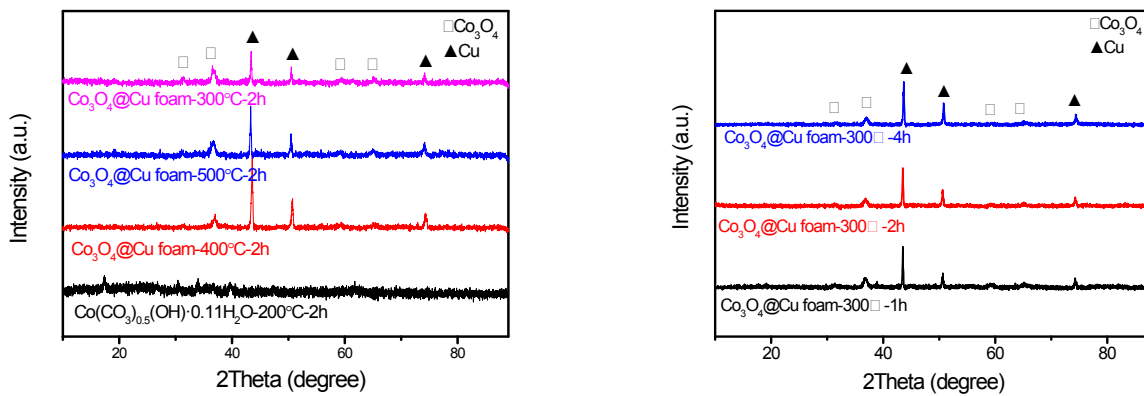

**Fig. S2** – XRD patterns of  $\text{Co}_3\text{O}_4$ @Cu foam annealed at different temperatures for different times.

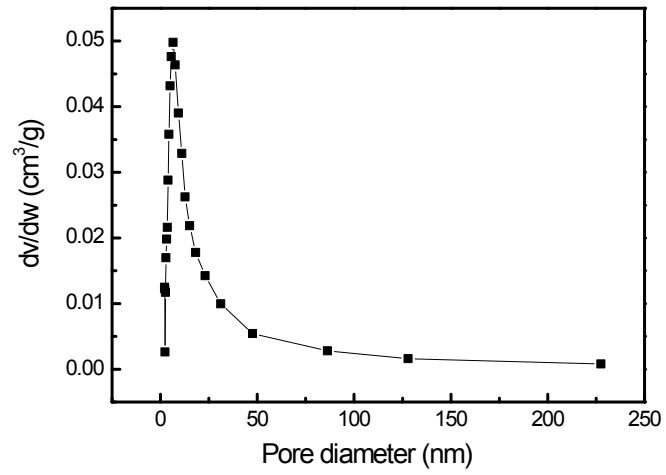

**Fig. S3** – BJH pore size distribution of  $\text{Co}_3\text{O}_4@\text{Cu}$  foam annealed at 300 °C for 2 h.

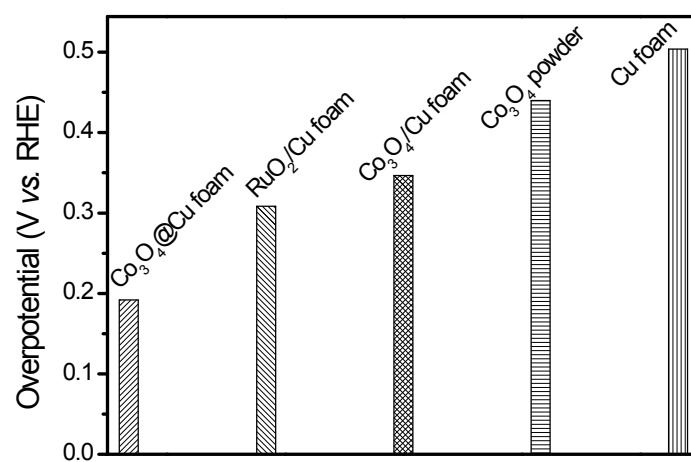

**Fig. S4** – Overpotential of Co<sub>3</sub>O<sub>4</sub>@Cu foam, RuO<sub>2</sub>/Cu foam, Co<sub>3</sub>O<sub>4</sub>/Cu foam, Co<sub>3</sub>O<sub>4</sub> powder and Cu foam at 10 mA cm<sup>-2</sup>.

**Table S1** – The OER performances of our Co<sub>3</sub>O<sub>4</sub>@Cu foam and previously reported, various Co<sub>3</sub>O<sub>4</sub>-based nanocomposites.

| Electrocatalyst                                                         | Overpotential (mV)<br>at 10 mA cm <sup>-2</sup> | Tafel slope<br>(mV dec <sup>-1</sup> ) | Testing environment | Reference |
|-------------------------------------------------------------------------|-------------------------------------------------|----------------------------------------|---------------------|-----------|
| Co <sub>3</sub> O <sub>4</sub> @Cu foam                                 | 192                                             | 42.8                                   | 1.0 M KOH           | this work |
| ZnCo <sub>2</sub> O <sub>4</sub>                                        | 390                                             | 46                                     | 1.0 M KOH           | 1         |
| Co <sub>3</sub> O <sub>4</sub> /rGO                                     | 346                                             | 47                                     | 1.0 M KOH           | 2         |
| G-Co <sub>3</sub> O <sub>4</sub>                                        | 313                                             | 56                                     | 1.0 M KOH           | 3         |
| Co <sub>3</sub> O <sub>4</sub> C-NA                                     | 290                                             | 70                                     | 1.0 M KOH           | 4         |
| Co <sub>3</sub> O <sub>4</sub> @C-MWCNTs                                | 320                                             | 62                                     | 1.0 M KOH           | 5         |
| N-doped Co <sub>3</sub> O <sub>4</sub> nanosheets                       | 310                                             | 59                                     | 1.0 M KOH           | 6         |
| FeCo-ONS                                                                | 308                                             | 36.8                                   | 1.0 M KOH           | 7         |
| Co <sub>3</sub> O <sub>4</sub> @Ni foam                                 | 230                                             | 65                                     | 1.0 M KOH           | 8         |
| Co <sub>3</sub> O <sub>4</sub> @Ni <sub>3</sub> S <sub>2</sub> /Ni foam | 260                                             | 121.7                                  | 1.0 M KOH           | 9         |
| Co <sub>3</sub> O <sub>4</sub> -C-NA/Ni foam                            | 310                                             | 90                                     | 1.0 M KOH           | 10        |
| Co <sub>3</sub> O <sub>4</sub> /CoMoO <sub>4</sub> /Ni foam             | 244                                             | 52                                     | 1.0 M KOH           | 11        |



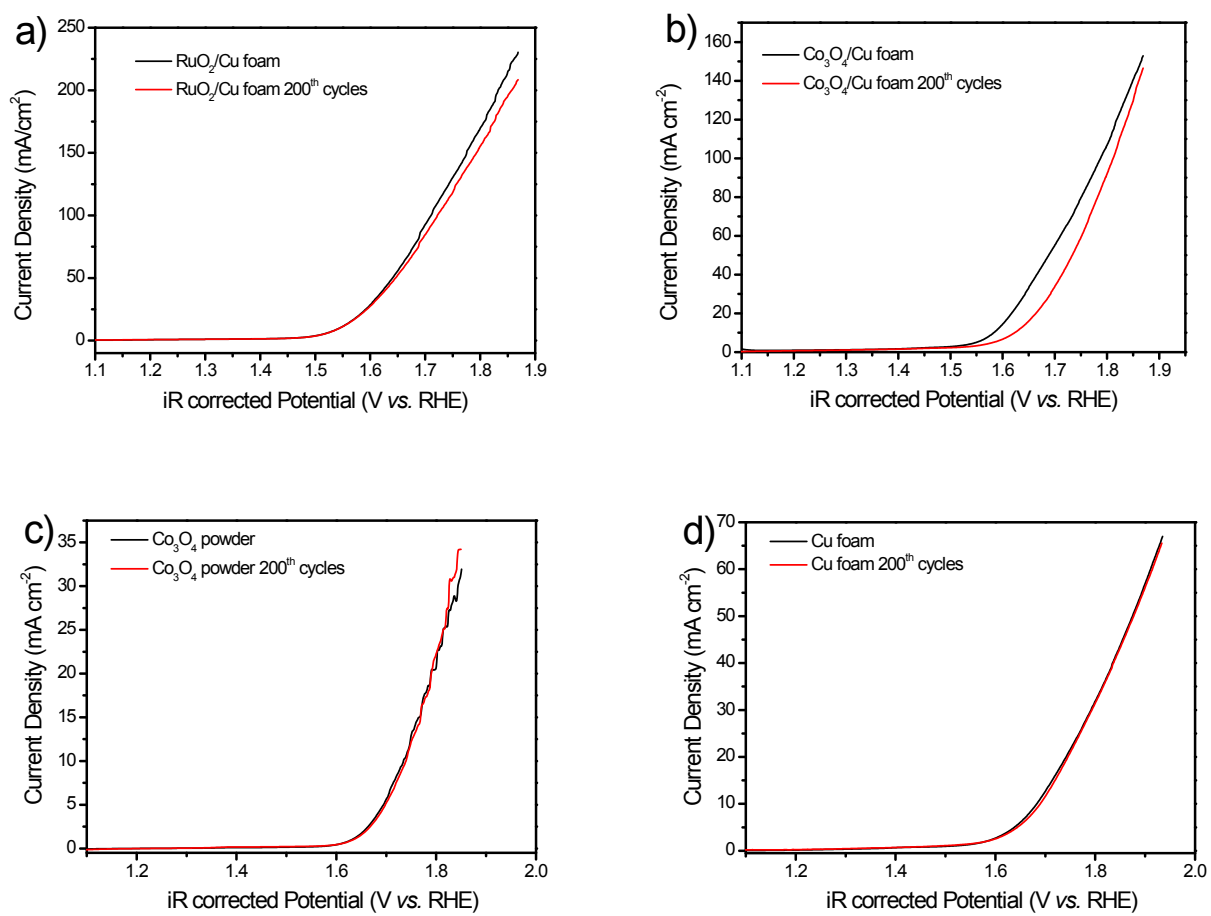

**Fig. S5** – LSVs of RuO<sub>2</sub>/Cu foam, Co<sub>3</sub>O<sub>4</sub>/Cu foam, Co<sub>3</sub>O<sub>4</sub> powder and Cu foam before and after 200 scans (scan rate = 5.0 mV s<sup>-1</sup>).

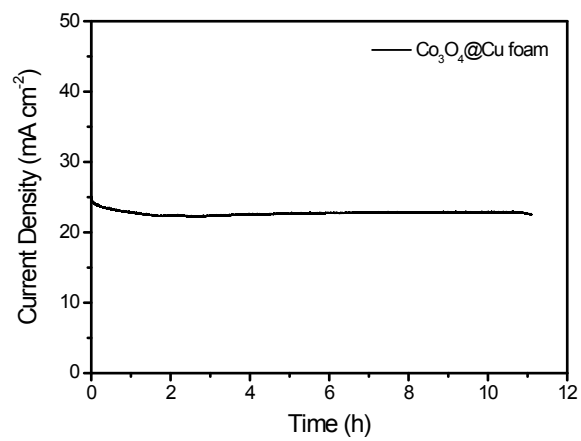

**Fig. S6** – Amperometric i-t curve to record long-term durability at the potential of 1.57 V vs. RHE for 11 h.

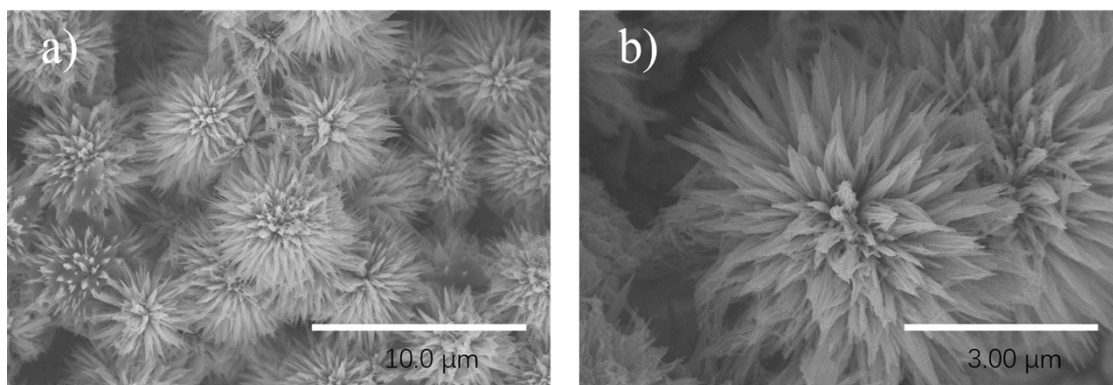

**Fig. S7** – (a) Low- and (b) high-magnification SEM images of  $\text{Co}_3\text{O}_4@\text{Cu}$  foam after OER tests.

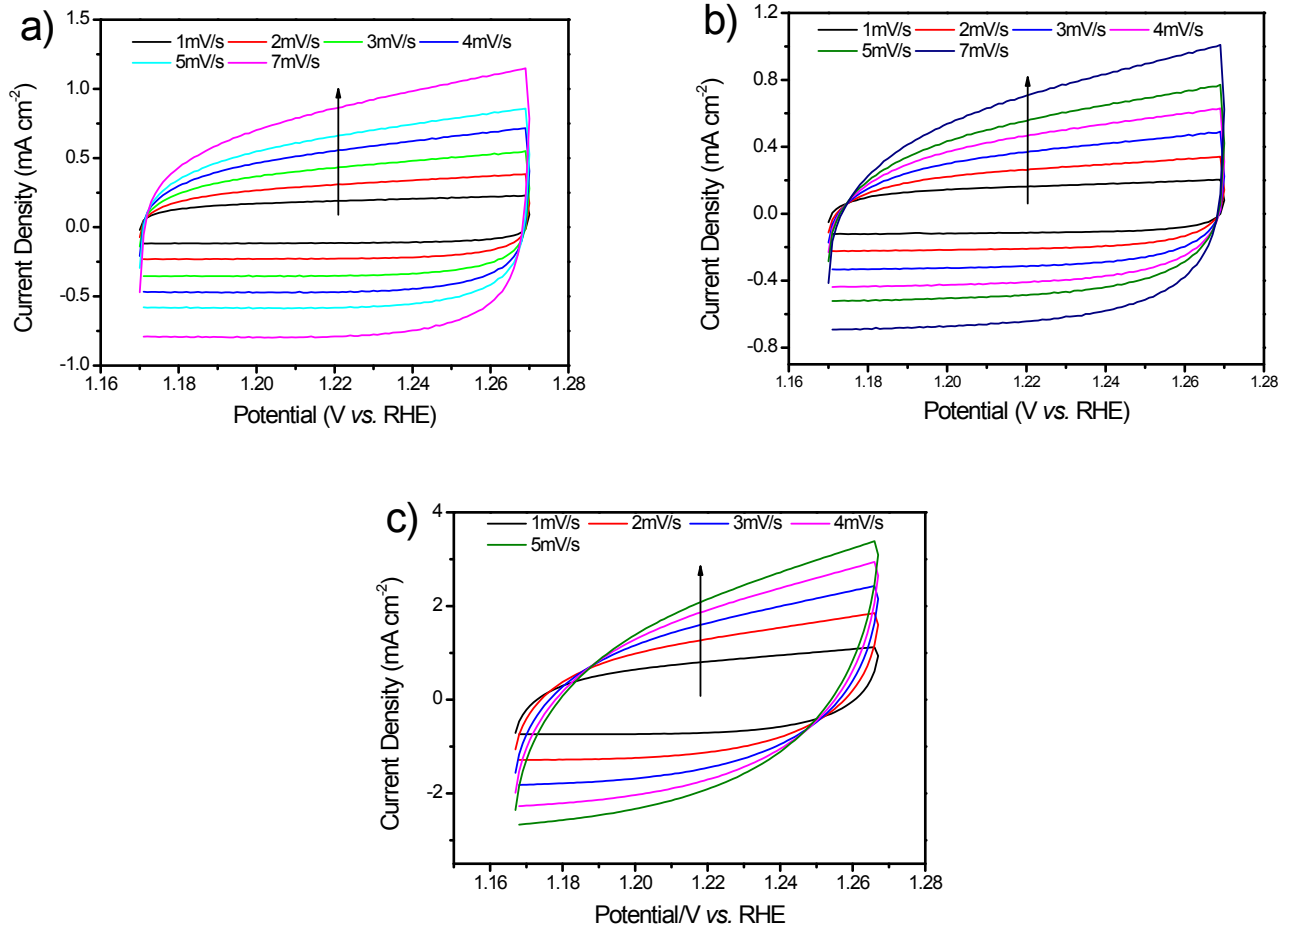

**Fig. S8** – EDLC curves of samples with different scan rates. (a) RuO<sub>2</sub>/Cu foam, (b) Co<sub>3</sub>O<sub>4</sub>/Cu foam, and (c) Co<sub>3</sub>O<sub>4</sub>@Cu foam.

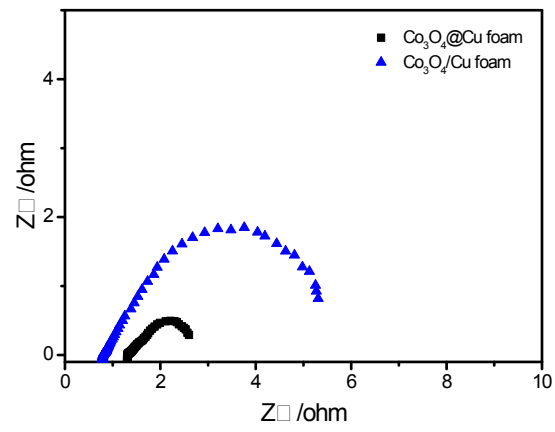

**Fig. S9** – Nyquist plots of  $\text{Co}_3\text{O}_4@\text{Cu}$  foam and  $\text{Co}_3\text{O}_4/\text{Cu}$  foam in 1.0 M KOH.

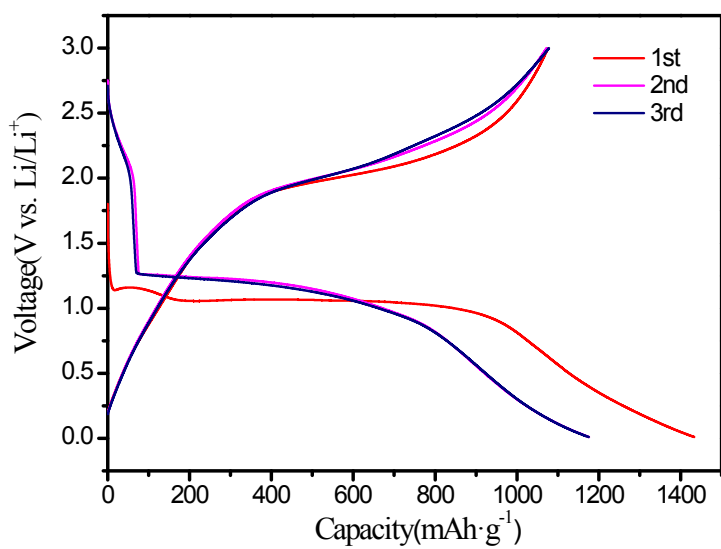

**Fig. S10** – Charging–discharging curves of the Co<sub>3</sub>O<sub>4</sub>@Cu foam electrode at 0.5C.

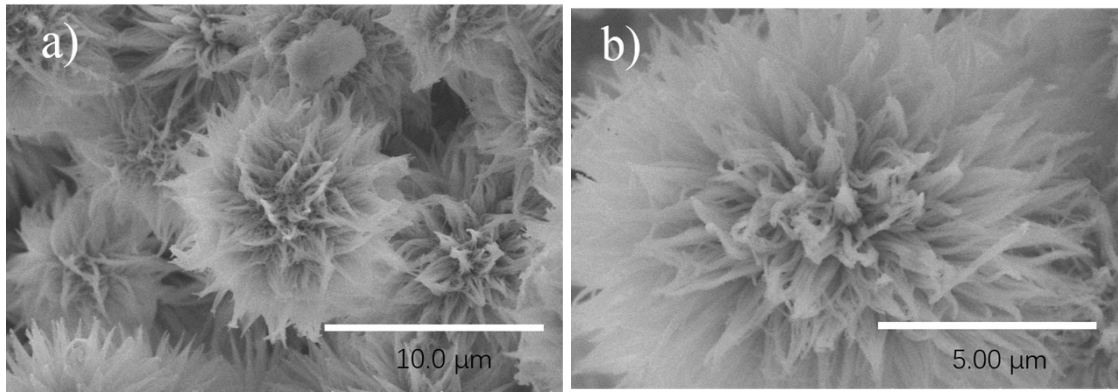

**Fig. S11** – (a) Low- and (b) high-magnification SEM images of  $\text{Co}_3\text{O}_4@\text{Cu}$  foam after 100 cycles at a current density of 2C.

**Table S2** – The cycle and rate performances of our Co<sub>3</sub>O<sub>4</sub>@Cu foam and previously reported, other Co<sub>3</sub>O<sub>4</sub>-based composite anodes.

| Samples                                            | Specific capacity (mA h g <sup>-1</sup> )<br>(cycling numbers) (current density) | High rate capacity (mA h g <sup>-1</sup> ) | Reference |
|----------------------------------------------------|----------------------------------------------------------------------------------|--------------------------------------------|-----------|
| Co <sub>3</sub> O <sub>4</sub> @Cu foam            | 882 (100) (2C)                                                                   | 626 (5C)                                   | this work |
| Co <sub>3</sub> O <sub>4</sub> /C                  | 490.5 (50) (0.5C)                                                                | 676 (2C)                                   | 12        |
| Co <sub>3</sub> O <sub>4</sub> nanosheets/graphene | 851.5 (2000) (2.25C)                                                             | 509.3 (5.62C)                              | 13        |
| C-doped Co <sub>3</sub> O <sub>4</sub> HNFs        | 1121 (100) (0.22C)                                                               | 607 (3.4C)                                 | 14        |
| N, P-codoped C/ Co <sub>3</sub> O <sub>4</sub>     | 927 (100) (0.11C)                                                                | 454 (1.1C)                                 | 15        |
| MWCNTs/ Co <sub>3</sub> O <sub>4</sub>             | 813 (100) (0.11C)                                                                | 514 (1.1C)                                 | 16        |
| Co <sub>3</sub> O <sub>4</sub> /N-PC               | 1730 (100) (0.11C)                                                               | 560 (11C)                                  | 17        |
| Co <sub>9</sub> S <sub>8</sub> /C-T                | 709 (150) (0.22C)                                                                | 362 (5.6C)                                 | 18        |
| Co <sub>3</sub> O <sub>4</sub> @CNT                | 862 (60) (0.11C)                                                                 | 408 (5.6C)                                 | 19        |



## ***Supporting References***

- 1 T. W. Kim, M. A. Woo, M. Regis and K. S. Choi, *J. Phys. Chem. Lett.*, 2014, **5**, 2370.
- 2 M. Leng, X. L. Huang, W. Xiao, J. Ding, B. H. Liu, Y. H. Du and J. M. Xue, *Nano Energy*, 2017, **33**, 445.
- 3 Y. F. Zhao, S. Q. Chen, B. Sun, D. W. Su, X. D. Huang, H. Liu, Y. M. Yan, K. N. Sun and G. X. Wang, *Sci. Rep.*, 2015, **5**, 7629.
- 4 T. Y. Ma, S. Dai, M. Jaroniec and S. Z. Qiao, *J. Am. Chem. Soc.*, 2014, **136**, 13925.
- 5 X. Z. Li, Y. Y. Fang, X. Q. Lin, M. Tian, X. C. An, Y. Fu, R. Li, J. T. Jin and J. Ma, *J. Mater. Chem. A*, 2015, **3**, 17392.
- 6 L. Xu, Z. Wang, J. Wang, Z. Xiao, X. Huang, Z. Liu, S. Wang, *Nanotechnology*, 2017, **28**, 165402.
- 7 L. Z. Zhuang, L. Ge, Y. S. Yang, M. R. Li, Y. Jia, X. D. Yao and Z. H. Zhu, *Adv. Mater.*, 2017, **29**, 1606793.
- 8 R. C. Li, D. Zhou, J. X. Luo, W. M. Xu, J. W. Li, S. S. Li, P. P. Cheng and D. S. Yuan, *J. Power Sources*, 2017, **341**, 250.
- 9 Y. Q. Gong, Z. F. Hu, H. L. Pan, Y. Lin, Z. Yang and X. Q. Du, *J. Mater. Chem. A*, 2018, **6**, 5098.
- 10 J. T. Ren, G. G. Yuan, C. C. Weng and Z. Y. Yuan, *ACS Sustainable Chem. Eng.*, 2018, **6**, 707–718.
- 11 Z. H. Pei, L. Xu and W. Xu, *Appl. Surf. Sci.*, 2018, **433**, 256.
- 12 J. Chen, X. H. Xia, J. P. Tu, Q. Q. Xiong, Y. X. Yu, X. L. Wang and C. D. Gu, *J. Mater. Chem.*, 2012, **22**, 15056.
- 13 Y. H. Dou, J. T. Xu, B. Y. Ruan, Q. N. Liu, Y. D. Pan, Z. Q. Sun and S. X. Dou, *Adv. Energy Mater.*, 2016, **6**, 1501835.
- 14 C. S. Yan, G. Chen, X. Zhou, J. X. Sun and C. D. Lv, *Adv. Funct. Mater.*, 2016, **26**, 1428.
- 15 Z. F. Wang, X. Zhang, Y. Sun, C. P. Wang, H. Zhang, Y. H. Shen and A. J. Xie, *J. Power Sources*, 2018, **740**, 446.

- 16 G. Huang, F. F. Zhang, X. C. Du, Y. L. Qin, D. M. Yin and L. M. Wang, *ACS Nano*, 2015, **2**, 1592.
- 17 Y. Hou, J. Y. Li, Z. H. Wen, S. M. Cui, C. Yuan and J. H. Chen, *Nano Energy*, 2015, **12**, 1.
- 18 M. K. Wang, J. Zhou, S. Cheng, Q. C. Pan, M. H. Yao, Y. Y. Zhu, P. Wu, H. W. Luo, L. F. Yang and M. L. Liu, *Mater. Lett.*, 2018, **217**, 163.
- 19 D. Gu, W. Li, F. Wang, H. Bongard, B. Spliethoff, W. Schmidt, C. Weidenthaler, Y. Y. Xia, D. Y. Zhao and F. Schuth, *Angew. Chem. Int. Ed.*, 2015, **54**, 7060.
